## RESEARCH ARTICLE

# Common guillemot (*Uria aalge*) eggs are not self-cleaning

Duncan Jackson\*, Jamie E. Thompson, Nicola Hemmings and Timothy R. Birkhead

## ABSTRACT

Birds are arguably the most evolutionarily successful extant vertebrate taxon, in part because of their ability to reproduce in virtually all terrestrial habitats. Common guillemots, *Uria aalge*, incubate their single egg in an unusual and harsh environment; on exposed cliff ledges, without a nest, and in close proximity to conspecifics. As a consequence, the surface of guillemot eggshells is frequently contaminated with faeces, dirt, water and other detritus, which may impede gas exchange or facilitate microbial infection of the developing embryo. Despite this, guillemot chicks survive incubation and hatch from eggs heavily covered with debris. To establish how guillemot eggs cope with external debris, we tested three hypotheses: (1) contamination by debris does not reduce gas exchange efficacy of the eggshell to a degree that may impede normal embryo development; (2) the guillemot eggshell surface is self-cleaning; (3) shell accessory material (SAM) prevents debris from blocking pores, allowing relatively unrestricted gas diffusion across the eggshell. We showed that natural debris reduces the conductance of gases across the guillemot eggshell by blocking gas exchange pores. Despite this problem, we found no evidence that guillemot eggshells are self-cleaning, but instead showed that the presence of SAM on the eggshell surface largely prevents pore blockages from occurring. Our results demonstrate that SAM is a crucial feature of the eggshell surface in a species with eggs that are frequently in contact with debris, acting to minimise pore blockages and thus ensure a sufficient rate of gas diffusion for embryo development.

**KEY WORDS:** Common murre, Faeces, Eggshell, Gas conductance, Incubation, Embryo development

## INTRODUCTION

Birds breed in virtually all terrestrial habitats, from deserts to polar regions, and even in wet environments (Deeming, 2002). This flexibility in breeding ecology (specifically, in habitat use) can be attributed to the fact that birds lay hard-shelled, desiccation-resistant eggs in a nest (or other incubation site) that is generally attended by one or both parents (Deeming, 2002). A consequence of laying eggs into a nest, which is then attended by a parent, is that the microclimate eggs are incubated in, and the conditions the avian embryo experiences during development, are largely independent of the wider environment (Ar, 1991; Deeming and Mainwaring, 2016; Rahn et al., 1983; Rahn, 1991). In some species, however, bird eggs are exposed to extreme and potentially detrimental conditions due to the lack of a nest, limitations of incubation sites or parental behaviours (Board, 1982).

The common guillemot, *Uria aalge* (Pontoppidan 1763), breeds colonially on exposed and rocky cliff ledges which minimises predation of their eggs and chicks from terrestrial animals (Nettleship and Birkhead, 1985). To reduce the risk of losing eggs or chicks to aerial predators, guillemots also breed at very high densities (typically, 20 pairs m<sup>-2</sup>) (Birkhead, 1977, 1993). One consequence of high density breeding is that colonies become 'unhygienic', with faecal material accumulating on the sea cliffs and breeding ledges. Contrary to previous suggestions (e.g. D'Alba et al., 2017), guillemot breeding sites are not usually dry, but are periodically wetted by rain, leading to the formation of dirty puddles on the breeding ledges (Fig. S1; T.R.B., personal observation). Since guillemots do not build a nest and instead incubate their single egg directly on bare rock ledges, their eggs are frequently exposed to a slurry of faeces, dirt, other detritus and water (henceforth 'debris') during incubation (Birkhead, 2016; Birkhead et al., 2017; Tschanz, 1990). Contamination of the eggshell by debris is almost inevitable as guillemots typically incubate their eggs between their legs (rarely with the egg entirely on top of their feet), and usually with the lower surface of the egg in direct contact with the substrate (Birkhead et al., 2018; Manuwal et al., 2001; Fig. S1).

Wet debris on the eggshell is likely to have a detrimental effect on embryonic survival since it may enter and block the gas exchange pores in the eggshell, reducing the gas exchange efficacy and also facilitate microbial invasion via the pore canals (Board, 1982). Both of these effects could compromise embryonic development through reduced water loss, CO<sub>2</sub> retention leading to hypercapnia (enhanced CO<sub>2</sub> in the embryo's blood), asphyxiation or infection, and can ultimately result in embryo mortality (Ar and Deeming, 2009; Board and Fuller, 1993). Despite these potential risks, guillemot eggs covered with debris are known to hatch successfully (T.R.B., personal observations), suggesting that either the debris that guillemot eggs are exposed to is relatively benign and does not compromise embryo survival, and/or guillemot eggs possess adaptations to cope with the impact of debris.

Guillemot eggs could be unaffected by extensive debris cover if, due to intrinsic properties of the debris, it does not reduce the gas exchange efficacy of the shell. Coating either part of the blunt or pointed end of a chicken, *Gallus domesticus*, egg with a man-made impermeable material (epoxy cement) has been shown to increase embryo mortality and levels of hatching failure (Tazawa et al., 1971). However, natural debris that adheres to the eggshell comes from a variety of sources and may include faecal material (which varies in its composition depending on the bird's diet, e.g. guillemot faeces contains small fish bones), dirt, sand, small stones, dust, feathers and vegetation. It is therefore likely to vary in gas permeability depending on its composition, and consequently may not have the same negative effects on embryo survival as impermeable cement.

Verbeek (1984) found that the water loss and hatching success of glaucous gull (*Larus glaucescens*) eggs were reduced when they were coated with gull faeces, but not when the eggs were coated with cormorant (*Phalacrocorax auritus* or *Phalacrocorax pelagicus*) faeces. This result is likely due to differences in the

Department of Animal & Plant Sciences, University of Sheffield, Sheffield S10 2TN, UK.

\*Author for correspondence (djackson3@sheffield.ac.uk)

 D.J., 0000-0003-4777-0275

composition of faeces between species, and therefore the ability of gases to diffuse through. As a result, Verbeek (1984) suggested that birds that direct their faeces away from the nest site during incubation (like glaucous gulls) produce faeces that would inhibit gas exchange if it covered their egg(s); defecating away from the incubation site may therefore have evolved in response to the negative impact of faeces on embryo development. Birds producing faeces that has little effect on eggshell conductance or hatching success may not be under the same selection to defecate away from their eggs or those of their neighbours in colonial breeding species. If Verbeek (1984) is correct, one might predict that guillemot faeces has little impact on gas exchange efficiency of the eggshell, since guillemots cannot not deliberately defecate away from their colony because they breed at such high densities. In fact, although they propel their faeces away from themselves, they regularly propel their faeces onto neighbouring birds and their eggs. In addition to faecal material, the debris on guillemot breeding ledges can include bones, stones, feathers, vegetation and soil, and thus may be porous and permeable to gases, allowing the relatively unrestricted diffusion of gases through it. However, if debris penetrates and blocks the gas exchange pores, it may still impede gas exchange by reducing the number of functional pores (open channels that allow the passage of gases through them) in the eggshell.

If guillemot eggs are affected by debris, one potential way they might cope is through ‘self-cleaning’ to remove contaminants, as suggested in observations by Steven Portugal and his team (<https://phys.org/news/2013-07-unique-shell-guillemot-eggs-edge.html>). Despite being widely covered by the media, including The Guardian (<https://www.theguardian.com/science/small-world/2013/jul/18/nanotech-roundup-cosmetic-fix-micro-batteries>), National Geographic (<https://www.nationalgeographic.com/science/phenomena/2013/07/04/scientist-spills-water-discovers-self-cleaning-bird-egg/>) and the BBC (article no longer available), this work remains unpublished (media reports were based on a conference presentation).

For a surface to be self-cleaning it must possess three properties: (1) high water repellency (known as super-hydrophobicity), with a stationary water contact angle of  $\sim 150$  deg; (2) low adhesion of extraneous debris to the eggshell surface; and hence (3) effortless removal of water and debris from the eggshell when water droplets make contact with its surface (Ensikat et al., 2011; Genzer and Marmur, 2008; Yuan and Lee, 2013). According to the unpublished findings, the surface structure of guillemot eggshells makes them super-hydrophobic and consequently, self-cleaning. If true, debris should simply leave the surface of the shell every time the guillemot eggshell makes contact with water. The idea that guillemot eggs are self-cleaning seems biologically implausible since most guillemot eggshells remain contaminated with debris during the incubation period (Birkhead, 2016; Birkhead et al., 2017), but the hypothesis has yet to be empirically tested.

If the guillemot eggshell is not self-cleaning, then the shell accessory material (SAM) on the surface of the eggshell could limit the impact of debris by preventing pore blockages (Board, 1982). Here, we use Board and Scott’s (1980) more general terminology: ‘shell accessory material’ (henceforth, SAM), rather than ‘cuticle’ (implying organic material) or ‘cover’ (implying inorganic material), as SAM is semantically more appropriate (Board et al., 1977). SAM is the outermost substance that sits on the exterior surface of the eggshell and can provide a variety of benefits, including waterproofing (Board and Halls, 1973a,b; Sparks and Board, 1984), microbial defence (D’Alba et al., 2014; Gole et al., 2014a,b; Ishikawa et al., 2010; Wellman-Labadie et al., 2008), desiccation resistance (Deeming, 1987; Thompson and Goldie,

1990), aesthetic properties such as gloss (Igc et al., 2015), UV reflectance (Fecheyr-Lippens et al., 2015), colouration and patterning (Lang and Wells, 1987; Samiullah and Roberts, 2014) and, as a consequence, protection from harmful wavelengths of light (Lahti and Ardia, 2016; Maurer et al., 2015). SAM may also provide increased shell strength (Portugal et al., 2017; Tyler, 1969). This wide range of properties may be attributable to the composite nature of SAM, as well as its varied thickness and composition in different species (Mikhailov, 1997). Despite the variability that exists in SAM, D’Alba et al. (2017) showed that SAM may possess some universal functions including modulating UV reflectance and providing a barrier against microbes across seven bird species studied. However, it is not clear whether SAM can also provide a barrier to debris, specifically, whether or not SAM can prevent debris from entering pores and blocking them.

Board and Perrott (1982) provided circumstantial, observational evidence that SAM may prevent pore blockages by debris in naturally incubated guinea fowl (*Numidia meleagris*) eggs. However, no manipulations of eggshell structure were performed to explicitly test the hypothesis that SAM prevents pore blockages. The adaptive role of SAM in the common guillemot’s egg is not clear (but see D’Alba et al., 2017 for suggestions). It is therefore unknown if SAM mitigates the negative costs of debris on the guillemot eggshell by, for example, preventing pores from becoming blocked.

The aim of the present study was to establish how common guillemot embryos survive incubation in eggs with large amounts of debris on their shell surface, by testing the following three hypotheses: (1) the properties of natural debris are such that contamination of the eggshell does not reduce the gas exchange efficacy of the shell; (2) the guillemot eggshell is self-cleaning; and (3) shell accessory material prevents pore blockages by debris, which in turn ensures sufficient gas exchange is permitted across the eggshell for embryonic development.

## MATERIALS AND METHODS

### Eggshell and debris sampling

Fresh eggs were collected in 2013–2016 under licence from Skomer Island, Wales, UK. All eggs were drained of their contents before being washed in distilled water and allowed to air dry at room temperature before storage. A hand-held rotary saw (Dremel Multi) was used to cut fragments ( $\sim 1$  cm<sup>2</sup>) from the eggshells for use in the experiments detailed below. Where possible, fragments were cut from areas of the eggshell that appeared to be clean and the fragments were then rinsed in distilled water and allowed to air dry. No soap or chemicals were used in the cleaning process as they can damage the surface of the shell and SAM (D.J., personal observation). Natural debris was opportunistically collected directly into sterile Eppendorf tubes from guillemot breeding ledges in 2014–2017. Debris was stored dry or semi-dry and rehydrated prior to use in experiments. All debris was used within one year of collection, typically sooner, within 1–2 months.

### Effect of debris on eggshell gas conductance

Fragments from the blunt end (see Birkhead et al., 2017 for sampling location) of each egg were carefully fixed to individual custom glass vials with an aperture diameter of  $\sim 0.3$ – $0.5$  cm using cyanoacrylate glue (Loctite, USA), so that the inside of the eggshell membrane was fixed to the glass vial, and left to dry for 24 h. The seal between the eggshell and the glass vial was checked before any excess shell around the edge of the glass vial was removed with a hand-held rotary saw. Finally, a further layer of glue was applied to

the circumference of the eggshell fragment and glass vial and left to dry. Each fragment underwent two treatments, a 'clean' trial followed by a 'dirty' trial. Before clean trials, eggshell fragments were carefully cleaned on the outer surface using a fine paintbrush to remove any dust and debris. For dirty trials, rehydrated natural debris (1 g of natural debris mixed with 300  $\mu$ l of distilled water) was applied to the outer eggshell surface of fragments using a paintbrush until they were evenly coated and no eggshell surface was visible.

A Bruker Alpha FTIR Spectrometer fitted with an Alpha-T module cell at a resolution of 0.8  $\text{cm}^{-1}$  was used to record the spectra of gases within the glass vials. Sample scan and background scan times were set to 32 scans, the result spectrum was set to 'absorbance', and the resulting spectrum was saved from the 360–7000  $\text{cm}^{-1}$  range. All spectra were baseline corrected using an independent background scan of laboratory air that was recorded before each series of measurements. To record the spectra readings, a glass vial with an eggshell fragment fixed to the top, was placed on to the extended finger of a gas cell (calcium fluoride windows, a 7 cm path length and one gas-tight 'Youngs' valve) and sealed using a petroleum-based jelly. To create the  $\text{CO}_2$ -rich environment inside the gas cell, small pieces of dry ice were initially placed into the cell before the attachment of the glass vial. To avoid a build-up of pressure while the dry ice sublimed, the gas-tight tap was opened slightly and the gas cell attached to a gas bubbler. Once the dry ice had completely sublimed and no further bubbles were observed inside the gas bubbler, the gas-tight tap was closed, and the gas bubbler removed. Immediately after this, the gas cell was positioned onto the Alpha-T cell sample holder on the Bruker Alpha FTIR and an absorbance spectrum was recorded and saved. Another spectrum was recorded and saved 1 h later to determine how much  $\text{CO}_2$  had diffused through the shell within this time frame.

To quantify the rate constant of eggshell  $\text{CO}_2$  gas diffusion for each fragment (henceforth,  $\text{CO}_2$  conductance), integral measurements were taken within a range that is known to correspond to several  $\text{CO}_2$  absorption bands (range set between 3482.5 and 3763.15  $\text{cm}^{-1}$ ) from the initial spectra and the spectra after 1 h for each individual sample (see <https://webbook.nist.gov/chemistry/>). Integral values were standardised so that the initial value was 100. The  $\text{CO}_2$  conductance was calculated by subtracting the standardised integral after 1 h from the standardised initial integral.

The method described above was chosen over other methods to measure eggshell conductance of eggshell fragments (e.g. Portugal et al., 2010) for two main reasons. Firstly, it directly measures the amount of  $\text{CO}_2$  gas lost through the eggshell rather than predicting gas loss from measured mass loss. This potentially provides more precise measurements as the precision of weighing scales can be more limiting than the FTIR spectrometer (J.E.T., personal observation), as well as providing more accurate data because gas loss is directly measured rather than predicted from mass loss. Secondly, and crucially, this method allowed us to repeat each trial on the same fragments when they were clean and dirty without damaging the fragment or the vessel the sample was attached onto, which would not be possible using Portugal et al.'s (2010) approach. Even though we are measuring the change in  $\text{CO}_2$  loss, water vapour, oxygen and  $\text{CO}_2$  conductance are all linked (Rahn and Paganelli, 1990; Ar and Deeming, 2009) so all gases are likely to be affected in a similar way and, therefore, any restrictions on  $\text{CO}_2$  conductance can theoretically be more broadly applied to any gas crossing the shell.

After the gas conductance of dirty fragments was measured, we cut the eggshell fragment off the glass vial and used X-ray microcomputed tomography (microCT) to assess the extent to which eggshell pores were blocked by debris. Because the eggshell

fragment needed to be cut off the glass vial for micro-CT scanning, we could not scan the eggshell fragments in between clean and dirty treatments, only once the gas conductance experiment was over and the eggshell fragment was dirty. Eggshell fragments were scanned in a Bruker Skyscan 1172 set to 100 kV electron acceleration energy and 90  $\mu$ A current, with the sample 45.7 mm from the X-ray source with a 1.0 mm aluminium filter; and the camera 218 mm away from the source. Camera resolution was set at 1048 $\times$ 2000 pixels, and a pixel size of 4.87  $\mu$ m. We used the same settings for each scan, collecting a total of 513 projection images over a 180 deg rotation using a rotation step size of 0.4 deg and a detector exposure of 885 ms integrated over three averaged images, resulting in a total scan time of 38 min. One eggshell fragment was scanned during each session. Projection images were reconstructed in NRecon software (version 1.6.10.2) after which image analysis was performed in CTAn (CT-analyser, version 1.14.41), CTVOx (CT-Voxel, version 3.0) and CTVol (CT-Volume, version 2.2.3.0); all the above software was provided by Bruker micro-CT, Kontich, Belgium). Reconstruction parameters used were: dynamic image range; min. attenuation coefficient=0.0025, max.=0.05; level 2 asymmetrical boxcar smoothing; ring artefact correction=12; beam hardening correction of 20% and auto misalignment compensation. Resultant images were saved as 8-bit bitmaps.

Two 3D models – one for the shell and another for the debris – were created for each shell fragment by segmenting the images in CTAn. Shell models were created by initially resizing the dataset by a factor of 2, with averaging in 3D on, before using automatic (Otsu's method) thresholding to segment the images, followed by low level despeckling of white and black pixels in 2D space (<10 pixels). The 3D model was then created using an adaptive rendering algorithm with smoothing on, a locality value of 1 and a tolerance of 0.05, and then saved as a .ctm file. Debris models were created by initially resizing the dataset by a factor of 2, with averaging in 3D off, before manually thresholding for debris to segment the images, followed by low level despeckling of white (<2 pixels) and black (<10 pixels) pixels in 2D space (<10 pixels). Again, the 3D model was then created using an adaptive rendering algorithm with smoothing on, a locality value of 1 and a tolerance of 0.05, and saved as a .ctm file. Both models were loaded into CTVol, aligned and pore channels were visually inspected to see if they were blocked by debris (Fig. S2). Owing to the image processing protocols followed, we could detect air spaces (and blockages) no smaller than 10  $\mu$ m, so our method may have overestimated the number of blocked pores since any pores with small air spaces within the debris blockage would have been undetectable at the resolution limit. This measure is therefore a proxy of the level of pore blockages within an eggshell fragment, rather than an absolute value. This methodology may introduce a bias if different types of debris are studied, but in each of our experiments debris was used from a single sample collected from the field, removing this issue. Only blockages inside the pore channel were counted, and not blockages at the surface of the pores, because the thresholding parameters used to identify debris could not distinguish between debris and the shell membranes, and potentially SAM on the shell surface.

The number of blocked pores was divided by the total number of pores to provide an estimate of the proportion of blocked pores per fragment. The thickness of debris on the surface of the shell (above each pore), and the length of each pore channel was measured in CTAn using the line measurement tool and averaged for each eggshell fragment. The thickness of the true shell (the calcium carbonate layers of the eggshell, excluding the organic membranes) was also measured at 10 locations using the line measurement tool and averaged for each fragment (see Birkhead et al., 2017).

### Self-cleaning eggs

Using a method similar to Vorobyev and Guo (2015), we tested the most important property of self-cleaning surfaces: whether water droplets and debris readily leave the guillemot eggshell surface together. Ten freshly collected guillemot eggshells and five museum samples were used in this study. Fragments were taken from the equator of each eggshell (see Birkhead et al., 2017), and two fragments per eggshell were studied per treatment. An eggshell fragment was attached to a stand tilted at 8 deg and dust from a household vacuum cleaner (as used in Vorobyev and Guo, 2015), was applied to the shell's surface. In a series of 15–20 droplets, 400  $\mu\text{l}$  of water was dripped on to the fragment and the shell was examined by eye. If the eggshell fragment contained a puddle of water carrying floating or stationary dust then the surface was deemed to not be self-cleaning, as water and debris still remained on the surface (see Introduction for definition of self-cleaning). If the surface did not contain any floating dust particles or any water, then the surface was classified as self-cleaning (Vorobyev and Guo, 2015). To validate this simple self-cleaning test, we repeated this trial using the following known self-cleaning materials; the fresh, young leaves of cauliflower (*Brassica oleracea* var. *botrytis*), broccoli (*Brassica oleracea* var. *italica*) and collard (spring) greens (*Brassica oleracea* var. *viridis*). After the dust trial on *Brassica* leaves, very little or no water remained on the surface of the leaves as it bounced off the samples removing debris with it (Movie 1), therefore validating the use of this simple self-cleaning test to determine if guillemot eggshells are self-cleaning. Self-cleaning tests were repeated using wet debris (a vial containing 2.5 ml of semi-dry natural debris was diluted with 100  $\mu\text{l}$  of distilled water) and debris that had been allowed to dry onto the shell to assess if guillemot eggshell is self-cleaning against natural debris it would encounter during incubation.

After the self-cleaning experiment was conducted, eggshell fragments were washed in excess water and allowed to dry, to mimic a heavy rain shower and followed by natural drying. Eggshell fragments were then qualitatively assessed (yes, or no) – by eye, using a macro lens on a digital camera, and by microscope – to establish whether any debris remained on the shell surface.

### Shell accessory material and pore blockages

To test the role of shell accessory material in preventing pore blockages by debris, we chemically manipulated eggshell fragments to remove shell accessory materials from the eggshell. Two pieces of shell ( $\sim 1\text{ cm}^2$ ) were cut from the equator of five fresh eggs (see Birkhead et al., 2017 for sampling location). One fragment acted as a control, and was washed in distilled water only, whereas the other fragment was first treated with thick household bleach (containing sodium hydroxide and hypochlorite) to remove organic shell accessory material (see Fig. S3), and then also washed in distilled water. Both the sodium hydroxide and sodium hypochlorite components of bleach have been used to remove organic shell accessory material from the surface of the shell in previous studies (Deeming, 1987; Tullett et al., 1976). Following the cleaning treatments, debris was carefully added to the surface of each shell fragment by squeezing a paintbrush loaded with wet debris (1 g of natural debris mixed with 300  $\mu\text{l}$  of water) with forceps. The debris was allowed to air dry for at least 24 h.

Eggshell fragments were scanned in a Bruker Skyscan 1172 using similar settings as detailed above, except that in this case a pixel size of 4  $\mu\text{m}$  was used; thus the sample was 48.7 mm from the X-ray source with a 1.0 mm aluminium filter, and the camera was 283 mm away from the source. We collected 499 projection images each with an exposure time of 1475 ms, leading to a scan time of 49 min.

These settings provided higher resolution data compared with those used above. A lower pixel size had to be used to scan the fragments used in the gas conductance trials to ensure that all of the eggshell exposed over the hole in the glass vial was scanned, whereas this was not a limitation here.

Two 3D models were created per shell fragment (one for the shell and another for the debris) in CTAn by thresholding for each material (automatically for the shell using Otsu's method and manually for debris). Model creation parameters were the same as those discussed earlier except that shell models were created by initially resizing the dataset by a factor of 2 with averaging in 3D off. To account for differences in pore numbers between pairs of fragments, only the first 15 pores that could be visualised by reslicing the  $z$ -stack of reconstructed images were selected to assess pore blockages. The models were then loaded into CTVol, and pore channels were visually inspected to see if they were blocked by debris model (Fig. S2). As explained above, this measure provides a proxy rather than the absolute number of blocked pores. However, since we were able to use a higher scanning (and model) resolution in this experiment, detection of pore blockages and air spaces in between debris should have a limit of  $\sim 8\text{ }\mu\text{m}$ .

### Statistical analysis

All statistical analyses were performed in R (version 3.3.1, <http://www.R-project.org>). We used a paired  $t$ -test to test whether the presence of debris on the eggshell influenced  $\text{CO}_2$  conductance. We used Pearson's product moment correlations to establish whether a correlation existed between the clean eggshell  $\text{CO}_2$  conductance and the number of pores in an eggshell fragment or the length of those pores (measured both directly and by using the proxy of shell thickness). Pearson's product moment correlations were also used to establish whether a correlation existed between the relative change in  $\text{CO}_2$  loss between clean and dirty fragments and the proportion of pores blocked in an eggshell fragment, or the thickness of the debris on the surface of the shell. Finally, paired  $t$ -tests were performed to assess whether SAM on the surface of guillemot eggshells limits the number of pores that are blocked by wet debris when it is applied to the outer surface of the shell.

## RESULTS

### Effect of debris on eggshell gas conductance

The rate of gas exchange for clean eggshell fragments was positively correlated with the number of pores present in an eggshell fragment ( $r=0.733$ ,  $P=0.016$ ,  $n=10$ ), but not with either the mean length of pores ( $r=0.045$ ,  $P=0.902$ ,  $n=10$ ), nor the mean trueshell thickness ( $r=-0.185$ ,  $P=0.610$ ,  $n=10$ ). After debris was applied to the eggshell,  $\text{CO}_2$  conductance significantly decreased ( $t=3.02$ , d.f.=9,  $P=0.014$ ; Fig. 1). The relative reduction in  $\text{CO}_2$  conductance of the eggshell after the application of debris was negatively correlated with the proportion of pores in the eggshell that were blocked ( $r=-0.821$ ,  $P=0.004$ ,  $n=10$ ), with fragments possessing a greater proportion of blocked pores showing a greater reduction in  $\text{CO}_2$  conductance compared with when the fragments were clean (Fig. 2). The reduction in  $\text{CO}_2$  conductance was not related to the average thickness of the debris on the eggshell above each pore (absolute difference in  $\text{CO}_2$  conductance:  $r=-0.160$ ,  $P=0.66$ ,  $n=10$ ; relative difference:  $r=-0.21$ ,  $P=0.56$ ,  $n=10$ ).

### Self-cleaning eggs

None of the common guillemot eggshell fragments studied here demonstrated any self-cleaning ability against dust. All fragments were covered in a puddle of water containing dust at the end of the

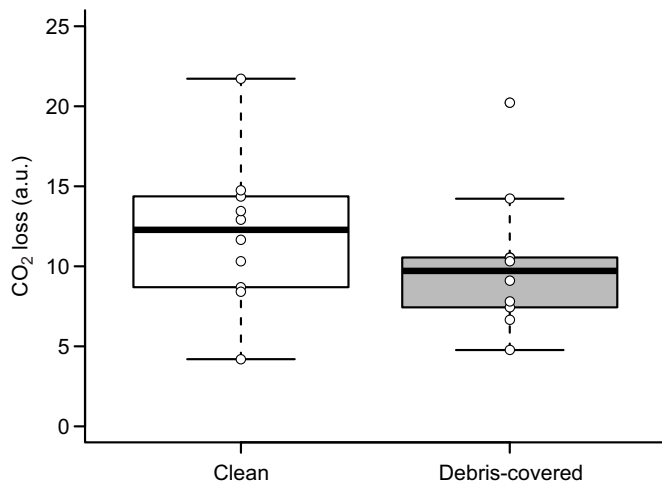

**Fig. 1. The effect of debris on CO<sub>2</sub> loss through common guillemot eggshell.** The rate of CO<sub>2</sub> loss significantly decreased after the application of natural debris onto the eggshell (paired *t*-test:  $t=3.02$ , *d.f.*=9,  $P=0.0144$ ,  $n=10$ ). Boxes are the interquartile range, black line within the box is the median, the whiskers show the highest and lowest values and the circles are the individual data points. a.u., arbitrary units.

trial, which is characteristic of materials that are not superhydrophobic and not self-cleaning (Movie 2; Vorobyev and Guo, 2015). None of the guillemot eggshell fragments demonstrated any self-cleaning ability against either wet or dry natural debris (Fig. 3; Movie 3). It was possible to remove some debris – but not all – by washing the eggshell with water, but a large volume of water had to be applied and debris removal appeared to depend on water volume and/or pressure. This is not necessarily biologically relevant with respect to the circumstances in which guillemots breed because even when it is raining, it is unlikely that a large volume of pressurised clean water will make contact with the eggshell surface all at once. Instead, it is more likely that dirty water and wet debris from the cliff ledges will come into contact with the egg. Even after excessive

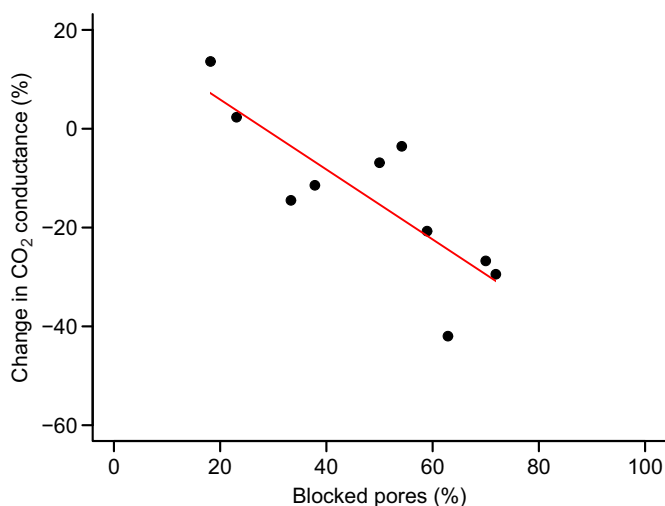

**Fig. 2. The effect of blocked pores on CO<sub>2</sub> conductance through guillemot eggshell.** The relative reduction in CO<sub>2</sub> conductance of the eggshell after the application of debris is negatively correlated with the proportion of pores in the eggshell that are blocked (Pearson's product moment correlation:  $r=-0.821$ ,  $P=0.004$ ,  $n=10$ ). Change in CO<sub>2</sub> conductance was calculated as:  $[(\text{'dirty' gas conductance} - \text{'clean' gas conductance}) / \text{'clean' gas conductance}] \times 100$ . The red line is the line of best fit.

washing, fragments were not completely clean, with small amounts of debris and staining remaining (Figs 3,4).

### Shell accessory material and pore blockages

The removal of SAM from eggshell fragments resulted in a significant increase in the proportion of pores that were blocked after the experimental application of natural debris to the shell surface, compared with control fragments where SAM was still present ( $t=4.74$ , *d.f.*=4,  $P=0.009$ ; Fig. 5).

### DISCUSSION

Our results show that debris contaminating the surface of guillemot eggshells during incubation reduces the gas exchange efficacy of the eggshell, and the eggshell is not self-cleaning to help resolve this problem. Instead, the full impact of debris on the gas exchange efficacy of eggshell is minimised by shell accessory material (SAM). SAM protects pores, reducing the number that are blocked by debris, which in turn minimises the reduction in eggshell gas conductance caused by debris on the eggshell.

### The drivers of eggshell gas conductance

Our data suggest that pore number is the primary driver of gas conductance in guillemot eggshell fragments. This is contrary to the predictions of Zimmerman and Hipfner (2007) who suggest that shell thickness (i.e. pore length) and pore size are the key drivers of porosity and therefore gas conductance in common guillemot eggs. The fact that pore length (shell thickness) does not drive eggshell gas conductance is consistent with ideas initially presented by Ar and Rahn (1985) and Rahn and Paganelli (1990), as well as in the discussions of Portugal et al. (2010) and Maurer et al. (2012), which allude to the fact that shell thickness is not a determinant of water vapour conductance. In the present study, we were unable to use micro-CT to scan clean fragments that were used in our gas conductance trials (see Materials and Methods for further details), so we cannot explicitly link pore size to eggshell conductance. However, evidence from other studies suggests that the role of pore size is likely to be minor compared with that of pore number or density (Ar and Rahn, 1985; Rahn and Paganelli, 1990; Rokitka and Rahn, 1987; Simkiss, 1986; see Table 1).

If pore number is the main driver of gas conductance across the eggshell, then predictions made using the calculations based on the traditional theoretical formulae presented in Ar et al. (1974) and Ar and Rahn (1985), based on Fick's law of diffusion, may be incorrect as they erroneously include terms for pore length (shell thickness) and pore area. Previous research has suggested that calculated versus measured conductance values are not consistent; in fact, measured values can be three times lower than calculated values (Tøien et al., 1988). Inclusion of pore size and pore length (shell thickness) could be one reason for this discrepancy, alongside a lack of consideration of the effects of (1) SAM (Thompson and Goldie, 1990; Tøien et al., 1988), (2) convective and diffusive resistance (Tøien et al., 1988), and (3) internal heat changes due to the metabolic rate of the developing embryo. In addition, historical methods used to study shell thickness and porosity were imprecise, unreliable and inaccurate. For example, pore size was likely overestimated in previous studies because the minimum cross-sectional dimensions (e.g. area or radius) could not always be measured as they are within the pore channel, and therefore measures from the inner surface of the shell were used instead under the presumption that these dimensions were the limiting dimensions (see Birkhead et al., 2017). Furthermore, shell thickness measures are not always the same as pore length (see datasets 1 and 2).

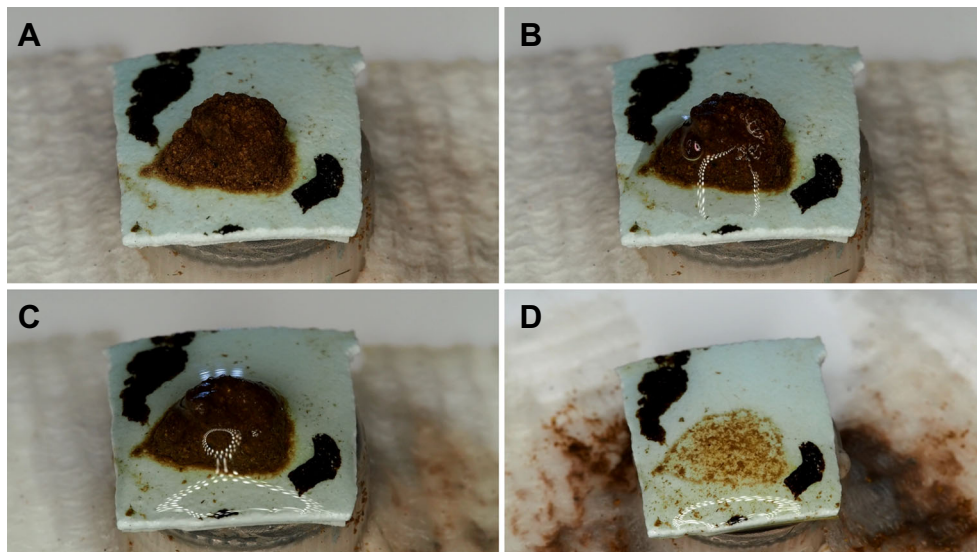

**Fig. 3. A self-cleaning trial involving debris dried on to guillemot eggshells.** (A) An eggshell fragment with debris on the surface. (B) The same fragment after the first drop of water has fallen onto the shell surface. (C) At the end of the trial, water and debris remain on the eggshell surface, illustrating that the sample is not self-cleaning. (D) After the trial, excess clean water was used to wash off the debris. Even after this cleaning, debris remains on the eggshell surface as stains or remnants. The large patch in the centre of the eggshell fragment is the debris; the two smaller dark patches either side are pigment on the eggshell surface. Eggshell sample is  $\sim 1 \text{ cm}^2$ .

Further investigation into the drivers of eggshell gas conductance is needed, particularly with the advent of more precise and accurate methods for measuring eggshell parameters and gas conductance. Gaining a better understanding of what drives eggshell conductance is particularly important because predicted gas conductance values are used in a variety of ways, including for inferring the nesting conditions of extinct birds and dinosaurs (e.g. Deeming, 2006; Deeming and Reynolds, 2016) and drawing comparative conclusions about species' developmental biology (e.g. Jaeckle et al., 2012).

#### The role of shell accessory materials in protecting pores

Our finding that eggshell gas conductance is driven by pore number is important because it means that any blockages within pores impose a serious restriction on gas exchange by reducing the

number of functional pores (i.e. unblocked, complete pores that gases can diffuse through) available for gas exchange. Our results show that blockage of pores by debris has a direct effect on the gas exchange efficacy of the eggshell, as was previously suggested by Board (1982) and Board and Perrott (1982). In a previous study, we suggested that the pyriform shape of common guillemot eggs, and the distribution of pores across the eggshell, may help to minimise the effects of eggshell contamination on the developing embryo (Birkhead et al., 2017). The orientation of the guillemot's pyriform egg during incubation is such that the blunt end of the egg (where porosity is highest) generally does not come into contact with the substrate, so most debris is concentrated on the pointed end of the egg where porosity is low. This potentially minimises the overall number of pores that become blocked and maximises the number of functional pores available for gas

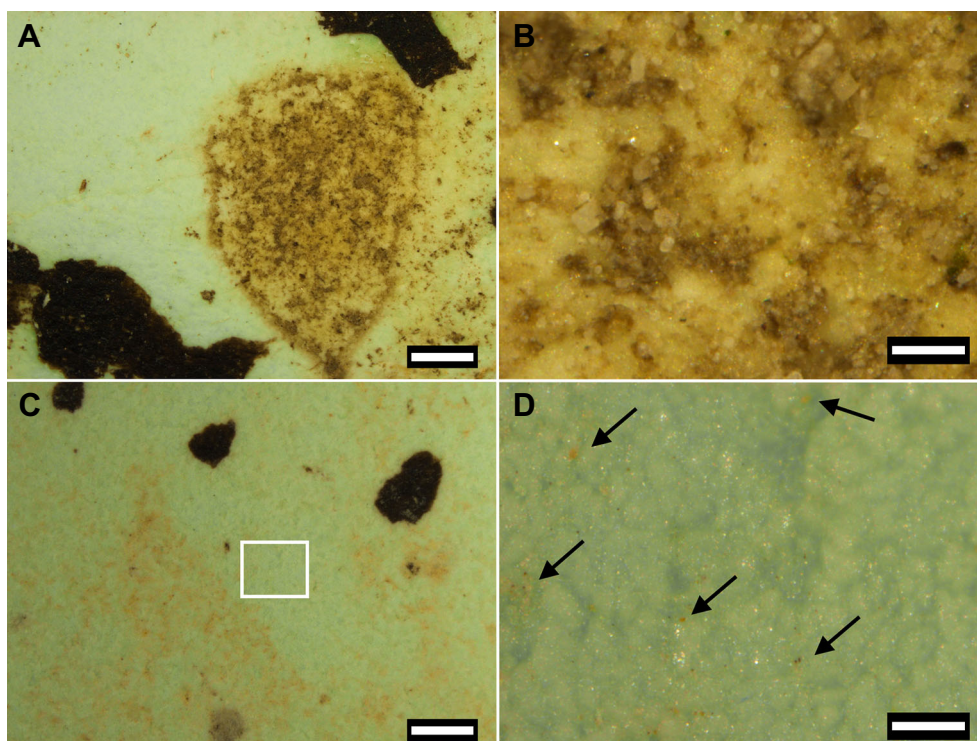

**Fig. 4. Natural debris on common guillemot shells.** (A,B) Stereoscopic microscopy images showing the remnants of debris remaining on a guillemot eggshell fragment after washing with excess water. (C,D) Stereoscopic microscopy images showing natural debris on common guillemot eggshell. The unmanipulated piece of guillemot eggshell in C shows natural debris staining, but also a patch that, to the naked eye, looks clean. The rectangle marks the 'clean' area shown in the high magnification image (D). There are in fact small particles of debris on the shell surface, a few of which are marked with arrows. Debris is light brown; darker brown/black patches in all images are eggshell pigment. Scale bars: 1000  $\mu\text{m}$  (A,C) and 100  $\mu\text{m}$  (B,D).

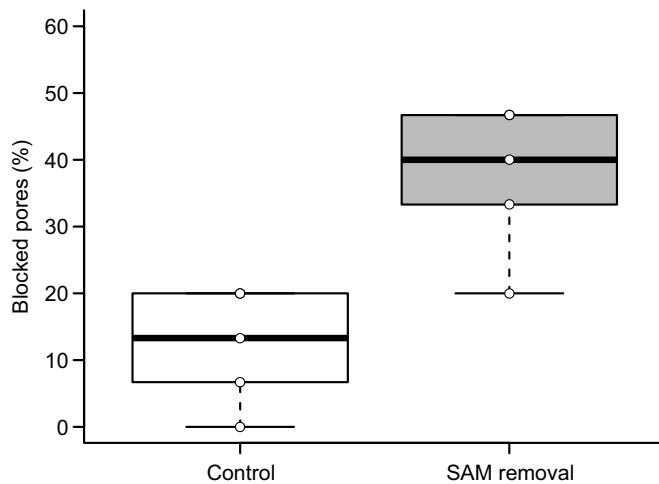

**Fig. 5. Removal of shell accessory material increases the number of pores blocked by natural debris.** The proportion of pores blocked by debris significantly increased after the removal of shell accessory material using bleach (paired *t*-test:  $t=4.74$ ,  $d.f.=4$ ,  $P=0.00904$ ,  $n=5$ ). Boxes are the interquartile range, black line within the box is the median, the whiskers show the highest and lowest values, and the circles are the individual data points.

exchange. However, debris on the elongated, pointed end of the egg could still lead to a large reduction in overall eggshell gas exchange, and, despite the egg's shape, debris is still sometimes seen on the blunt end. We show here that SAM prevents pores becoming blocked by debris, a finding consistent with Board and Perrott's (1982) observations that nesting debris penetrates pores and may reduce the total area of eggshell available for gases to diffuse through. SAM could therefore minimise the negative effects of debris covering the eggshell surface by minimising the number of pores that become blocked.

How SAM prevents pore blockages is not clear. One possibility is that the SAM acts as a physical barrier to the penetration of debris, as seemed to be the case for helmeted guinea fowl eggs (Board and Perrott, 1982). Alternatively, SAM may provide water resistance to

the eggshell, which prevents aqueous debris from entering eggshell pores (Board, 1981). Either way, if SAM is removed or damaged, the pores become vulnerable to blockages. Natural cracking of SAM can occur due to dehydration, and cracks could leave pores vulnerable, which may explain why some of the untreated eggshell fragments we studied to assess the impact of debris on eggshell conductance had a large proportion of blocked pores (see Fig. S4). Some eggshells also had poor quality SAM or a patchy SAM coverage meaning pores were uncovered and left vulnerable (Fig. S3), and in addition, our limited imaging and blockage detection resolution may have led us to consistently overestimate the proportion of blocked pores (see Materials and Methods). Although this would not invalidate our overall findings, it could explain the unexpectedly high proportion of blocked pores found in untreated eggshells when debris was added onto the surface of the shell. Whether SAM plays the same role on the eggs of other species that are directly exposed to debris (e.g. the blue footed booby, *Sula nebouxi*; Mayani-Parás et al., 2015), remains to be tested.

### Guillemot eggs are not self-cleaning

Despite suggestions of previous researchers, we found no evidence that the guillemot eggshell surface is self-cleaning. Common guillemot eggshells lack the three important properties which would make them self-cleaning. (1) They are not super-hydrophobic. Reported water contact angles are lower than 150 deg. For example, Portugal and colleagues reported values of approximately 120 deg (see <http://phenomena.nationalgeographic.com/2013/07/04/scientist-spills-water-discovers-selfcleaning-bird-egg/>) while D'Alba et al. (2017) reported values of just over 90 deg. The latter is potentially lower due to eggshell treatment with 70% alcohol in that study. (2) Debris strongly adheres to the guillemot eggshell surface (see fig. 3 in Birkhead et al., 2017). Our self-cleaning trials corroborate observations that debris cannot easily be washed off most guillemot eggshells. Instead, scrubbing or wiping with excess amounts of clean water is required to remove debris, and this is still often unsuccessful, implying that debris has high adhesion with the shell (J.E.T. and D.J., personal observations). Furthermore, it is worth noting that even

**Table 1. Linear regression relationships between measured or calculated eggshell parameters and observed gas conductance in the eggs of 21 Anatidae species**

| Parameter                                                                          | Calculation                                                                           | Adjusted $R^2$ | Regression equation | <i>P</i> -value | Source                                                                 |
|------------------------------------------------------------------------------------|---------------------------------------------------------------------------------------|----------------|---------------------|-----------------|------------------------------------------------------------------------|
| Total pore circumference* ( $\mu\text{m}$ )                                        | $2\pi \times \text{pore radius} \times \text{pores per egg}$                          | 0.633          | $y=0.0153x+5.35$    | <0.0001         | Recalculated from Hoyt et al. (1979) using formula from Simkiss (1986) |
| Calculated gas conductance <sup>‡</sup> ( $\text{mg day}^{-1} \text{ Torr}^{-1}$ ) | $(2.24 \times \text{pore area} \times \text{pores per egg}) / \text{shell thickness}$ | 0.371          | $y=0.575x+9.41$     | 0.00202         | Calculated by Hoyt et al. (1979)                                       |
| Total pore area ( $\mu\text{m}^2$ )                                                | Measured pore area $\times$ pores per egg                                             | 0.485          | $y=0.0079x+9.63$    | 0.000271        | Calculated from data in Hoyt et al. (1979)                             |
| Pores per egg <sup>§</sup>                                                         | Calculated from surface area and measured pore density                                | 0.624          | $y=0.00157x+2.52$   | <0.0001         | Data from Hoyt et al. (1979)                                           |
| Shell thickness (mm)                                                               | Measured directly from shell                                                          | 0.267          | $y=56.7x-3.32$      | 0.00968         | Data from Hoyt et al. (1979)                                           |
| Pore area ( $\mu\text{m}^2$ )                                                      | Average measured area of a pore                                                       | 0.00479        | $y=0.0143x+14.5$    | 0.308           | Data from Hoyt et al. (1979)                                           |

The total number of pores per egg ( $R^2=0.624$ ) and the total pore circumference ( $R^2=0.633$ ) explain more variation in observed gas conductance than does calculated gas conductance using the traditional calculation ( $R^2=0.371$ ), highlighting an issue with the assumption that pore area and shell thickness are determinants of gas conductance. The fact that total pore area per egg ( $R^2=0.485$ ) explains less variation than the total number of pores per egg, and pore area is not significantly associated with observed gas conductance, suggests that pore area does not drive eggshell gas conductance.

\*Based on Stefan's law of diffusion.

<sup>‡</sup>Constant  $\times$  total pore area  $\times$  pore length<sup>-1</sup> based on Fick's law of diffusion.

<sup>§</sup>It is worth noting that Ar and Rahn (1985)'s regression analysis of pore number against eggshell gas conductance on eggs from 134 different species had an  $R^2$  value of 0.89.

apparently clean sections of naturally incubated eggs usually contain staining or particles of debris when viewed at high magnification, illustrating that debris does indeed adhere to the eggshell surface (Fig. 4). (3) Consequently, natural debris on the guillemot eggshell surface does not readily leave when water makes contact with it and the eggshell (Fig. 3; Movie 3).

The fact that guillemot eggshells do not possess self-cleaning properties becomes intuitive when we consider how debris interacts with the eggshell surface. A single application of wet debris can not only cover the eggshell surface, but can also cause pore blockages that reduce the ability of gases to pass through the shell. A self-cleaning surface on its own would thus be insufficient to maintain adequate gas exchange across the eggshell, unless there was also a unique mechanism to unblock pore channels. Given that SAM prevents pore blockages, and that the presence of debris does not appear to limit the ability of gases to diffuse across the eggshell, there would be little selection on guillemot eggshell structure for self-cleaning properties in the context of eggshell conductance.

Instead of evolving self-cleaning eggs, guillemots may avoid the problem of their eggs becoming excessively covered in debris during incubation via an altogether different mechanism: egg turning. Egg turning is the process where incubating parents turn their eggs around along the longitudinal axis, which is important for normal embryonic development and subsequent hatching (Deeming and Reynolds, 2016). Turning may physically remove debris via abrasion and limit an excessive build-up of material on the surface of the shell (Board and Scott, 1980; Board, 1982; Board et al., 1984), which could affect embryo development by reducing gas conductance, increasing the risk of embryonic infection or interfering with contact incubation and thermoregulation. Anecdotal observations suggest that incubation and egg turning limits the build-up of material on common guillemot eggs, as abandoned, un-incubated eggs soon become completely covered in debris (T.R.B., personal observations; see Fig. S1 for an example). Furthermore, Verbeek (1984) suggested that abrasion of faecal material from the surface of glaucous gull eggs may have partially restored their hatching success, although this was not based on direct experimental evidence. However, guillemot eggs that are partially or largely covered with debris still tend to hatch (T.R.B., personal observation), indicating that complete debris removal is not essential for normal embryo development in this species.

## Conclusion

The findings of the present study suggest that the effect of debris contaminating the surface of common guillemot eggs is minimised by the presence of SAM, which reduces the number of pores that become blocked. This, in combination with the fact that the pyriform shape of the guillemot egg minimises the amount of debris that covers the highly porous blunt end of the egg (Birkhead et al., 2017), ensures that a high proportion of pores remain functional during incubation and guillemot eggs are able to maintain efficient gas exchange despite being covered in debris. The ability of SAM to minimise pore blockages by debris, rather than the egg's shape or pore distribution, is presumably crucial when eggs are heavily covered with debris. It seems likely that the presence of functional SAM, rather than solely the egg's shape, allows guillemot eggs to maintain gas exchange despite being covered in debris throughout the 32 day incubation period, allowing the embryo to develop normally.

## Acknowledgements

We thank the Skelet.AL lab for use of their micro-CT scanner; Thomas W. Smith and Dr Michael Hippler in the Department of Chemistry at the University of Sheffield

for their guidance and assistance in conducting the gas conductance experiments using FTIR, the Wildlife Trust of South and West Wales Trust for permission to work on Skomer Island NNR, and Natural Resources Wales (NRW) for licences to take eggs for scientific purposes. We also thank Professor Ben Hatchwell and the referees for comments on the manuscript.

## Competing interests

The authors declare no competing or financial interests.

## Author contributions

Conceptualization: T.R.B.; Methodology: D.J., J.E.T., N.H., T.R.B.; Formal analysis: D.J., J.E.T.; Investigation: D.J., J.E.T.; Resources: T.R.B.; Data curation: D.J.; Writing - original draft: D.J.; Writing - review & editing: J.E.T., N.H., T.R.B.; Visualization: D.J.; Supervision: N.H., T.R.B.; Project administration: D.J.; Funding acquisition: D.J., T.R.B.

## Funding

This work was funded by a grant from the Leverhulme Trust to T.R.B. and a University of Sheffield Postgraduate Scholarship to D.J. N.H. was supported by a Patrick & Irwin-Packington Fellowship from the University of Sheffield and a Royal Society Dorothy Hodgkin Fellowship.

## Supplementary information

Supplementary information available online at <http://jeb.biologists.org/lookup/doi/10.1242/jeb.188466.supplemental>

## References

- Ar, A. (1991). Roles of water in avian eggs. In *Egg Incubation: Its Effect on Embryonic Development in Birds and Reptiles* (ed. D. C. Deeming and M. W. J. Ferguson), pp. 229-244. Cambridge: Cambridge University Press.
- Ar, A. and Deeming, C. D. (2009). Roles of water and gas exchange in determining hatchability success. *Avian Biol. Res.* **2**, 61-66.
- Ar, A. and Rahn, H. (1985). Pores in avian eggshells: gas conductance, gas exchange and embryonic growth rate. *Respir. Physiol.* **61**, 1-20.
- Ar, A., Paganelli, C. V., Reeves, R. B., Greene, D. G. and Rahn, H. (1974). The avian egg: water vapor conductance, shell thickness, and functional pore area. *Condor* **76**, 153-158.
- Birkhead, T. R. (1977). The effect of habitat and density on breeding success in the common guillemot, *Uria aalge*. *J. Anim. Ecol.* **46**, 751-764.
- Birkhead, T. R. (1993). *Great Auk Islands*. London, UK: Poyser.
- Birkhead, T. R. (2016). *The Most Perfect Thing: The Inside (and Outside) of a Bird's Egg*. London, UK: Bloomsbury.
- Birkhead, T. R., Thompson, J. E., Jackson, D. and Biggins, J. D. (2017). The point of a Guillemot's egg. *Ibis* **159**, 255-265.
- Birkhead, T. R., Thompson, J. E. and Montgomerie, R. (2018). The pyriform egg of the Common Murre (*Uria aalge*) is more stable on sloping surfaces. *Auk* **135**, 1020-1032.
- Board, R. G. (1981). The microstructure of avian eggshells, adaptive significance and practical implications in aviculture. *Wildfowl* **32**, 132-136.
- Board, R. G. (1982). Properties of avian egg shells and their adaptive value. *Biol. Rev.* **57**, 1-28.
- Board, R. G. and Fuller, R. (1993). *Microbiology of the Avian Egg*. London, UK: Chapman and Hall.
- Board, R. G. and Halls, N. A. (1973a). The cuticle: a barrier to liquid and particle penetration of the shell of the Hen's egg. *Br. Poult. Sci.* **14**, 69-97.
- Board, R. G. and Halls, N. A. (1973b). Water uptake by eggs of mallards and guinea fowl. *Br. Poult. Sci.* **14**, 311-314.
- Board, R. G. and Perrott, H. R. (1982). The fine structure of the outer surface of the incubated eggshells of the Helmeted guinea fowl (*Numidia meleagris*). *J. Zool.* **196**, 445-451.
- Board, R. G. and Scott, V. D. (1980). Porosity of the Avian Eggshell. *Am. Zool.* **20**, 339-349.
- Board, R. G., Tullett, S. G. and Perrott, H. R. (1977). An arbitrary classification of the pore systems in avian eggshells. *J. Zool.* **182**, 251-265.
- Board, R. G., Perrott, H. R., Love, G. and Scott, V. D. (1984). The phosphate-rich cover on the eggshells of grebes (Aves: Podicipitiformes). *J. Zool.* **203**, 329-343.
- D'Alba, L., Jones, D. N., Badawy, H. T., Eliason, C. M. and Shawkey, M. D. (2014). Antimicrobial properties of a nanostructured eggshell from a compost-nesting bird. *J. Exp. Biol.* **217**, 1116-1121.
- D'Alba, L., Torres, R., Waterhouse, G. I. N., Eliason, C., Hauber, M. E. and Shawkey, M. D. (2017). What does the eggshell cuticle do? A functional comparison of avian eggshell cuticles. *Physiol. Biochem. Zool.* **90**, 588-599.
- Deeming, D. C. (1987). Effect of cuticle removal on the water vapour conductance of egg shells of several species of domestic bird. *Br. Poult. Sci.* **28**, 231-237.
- Deeming, D. C. (2002). *Avian Incubation: Behaviour, Environment and Evolution*. Oxford, UK: Oxford University Press.



- Deeming, D. C. (2006). Ultrastructural and functional morphology of eggshells supports the idea that dinosaur eggs were incubated buried in a substrate. *Paleontology* **49**, 171-185.
- Deeming, D. C. and Mainwaring, M. C. (2016). Functional properties of nests. In *Nests, Eggs and Incubation: New Ideas about Avian Reproduction* (ed. D. C. Deeming and S. J. Reynolds), pp. 29-49. Oxford, UK: Oxford University Press.
- Deeming, D. C. and Reynolds, S. J. (2016). *Nests, Eggs and Incubation: New Ideas about Avian Reproduction*. Oxford, UK: Oxford University Press.
- Ensik, H. J., Ditsche-Kuru, P., Neinhuis, C. and Barthlott, W. (2011). Superhydrophobicity in perfection: the outstanding properties of the lotus leaf. *Beilstein J. Nanotechnol.* **2**, 152-161.
- Fecheyr-Lippens, D. C., Igc, B., D'Alba, L., Hanley, D., Verdes, A., Holford, M., Waterhouse, G. I. N., Grim, T., Hauber, M. E. and Shawkey, M. D. (2015). The cuticle modulates ultraviolet reflectance of avian eggshells. *Biol. Open* **4**, 753-759.
- Genzer, J. and Marmur, A. (2008). Biological and synthetic self-cleaning surfaces. *MRS Bull.* **33**, 742-746.
- Gole, V. C., Chousalkar, K. K., Roberts, J. R., Sexton, M., May, D., Tan, J. and Kiermeier, A. (2014a). Effect of egg washing and correlation between eggshell characteristics and egg penetration by various *Salmonella typhimurium* strains. *PLoS ONE* **9**, e90987.
- Gole, V. C., Roberts, J. R., Sexton, M., May, D., Kiermeier, A. and Chousalkar, K. K. (2014b). Effect of egg washing and correlation between cuticle and egg penetration by various *Salmonella* strains. *Int. J. Food Microbiol.* **182-183**, 18-25.
- Hoyt, D. F., Board, R. G., Rahn, H. and Paganelli, C. V. (1979). The eggs of the Anatidae: conductance, pore structure, and metabolism. *Physiol. Zool.* **52**, 438-450.
- Igc, B., Fecheyr-Lippens, D., Xiao, M., Chan, A., Hanley, D., Brennan, P. R. L., Grim, T., Waterhouse, G. I. N., Hauber, M. E. and Shawkey, M. D. (2015). A nanostructural basis for gloss of avian eggshells. *J. R. Soc. Interface* **12**, 20141210.
- Ishikawa, S.-I., Suzuki, K., Fukuda, E., Arihara, K., Yamamoto, Y., Mukai, T. and Itoh, M. (2010). Photodynamic antimicrobial activity of avian eggshell pigments. *FEBS Lett.* **584**, 770-774.
- Jaeckle, W. B., Kiefer, M., Childs, B., Harper, R. G., Rivers, J. W. and Peer, B. D. (2012). Comparison of eggshell porosity and estimated gas flux between the brown-headed cowbird and two common hosts. *J. Avian Biol.* **43**, 486-490.
- Lahti, D. C. and Ardia, D. R. (2016). Shedding light on bird egg color: pigment as parasol and the dark car effect. *Am. Nat.* **187**, 547-563.
- Lang, M. R. and Wells, J. W. (1987). A review of eggshell pigmentation. *World's Poultry Sci. J.* **43**, 238-246.
- Manuwal, D. A., Carter, H. R., Zimmerman, T. S. and Orthmeyer, D. L. (2001). *Biology and conservation of the common murre in California, Oregon, Washington, and British Columbia. Vol. 1. Natural history and population trends*. US Geological Survey Biological Resources Division Information and Technology Report USGS/BRD/ITR-2000-0012, Washington, DC.
- Maurer, G., Portugal, S. J. and Cassey, P. (2012). A comparison of indices and measured values of eggshell thickness of different shell regions using museum eggs of 230 European bird species. *Ibis* **154**, 714-724.
- Maurer, G., Portugal, S. J., Hauber, M. E., Mikšik, I., Russell, D. G. D. and Cassey, P. (2015). First light for avian embryos: eggshell thickness and pigmentation mediate variation in development and UV exposure in wild bird eggs. *Funct. Ecol.* **29**, 209-218.
- Mayani-Parás, F., Kilner, R. M., Stoddard, M. C., Rodríguez, C. and Drummond, H. (2015). Behaviorally induced camouflage: a new mechanism of Avian egg protection. *Am. Nat.* **186**, E91-E97.
- Mikhailov, K. E. (1997). *Avian Eggshell: An Atlas of Scanning Electron Micrographs*. Hertfordshire, UK: British Ornithologists' Club Occasional Publications.
- Nettleship, D. N. and Birkhead, T. R. (1985). *The Atlantic Alcidae: The Evolution, Distribution and Biology of the Auks Inhabiting the Atlantic Ocean and Adjacent Water Areas*. London, UK: Academic Press Inc.
- Portugal, S. J., Maurer, G. and Cassey, P. (2010). Eggshell permeability: a standard technique for determining interspecific rates of water vapor conductance. *Physiol. Biochem. Zool.* **83**, 1023-1031.
- Portugal, S. J., Bowen, J. and Riehl, C. (2017). A rare mineral, vaterite, acts as a shock absorber in the eggshell of a communally nesting bird. *Ibis* **160**, 172-178.
- Rahn, H. (1991). Why birds lay eggs. In *Egg Incubation: Its Effect on Embryonic Development in Birds and Reptiles* (ed. D. C. Deeming and M. W. J. Ferguson), pp. 345-360. Cambridge, UK: Cambridge University Press.
- Rahn, H. and Paganelli, C. V. (1990). Gas fluxes in avian eggs: driving forces and the pathway for exchange. *Comp. Biochem. Physiol. A Physiol.* **95**, 1-15.
- Rahn, H., Krog, J. and Mehlum, F. (1983). Microclimate of the nest and egg water loss of the Eider *Somateria mollissima* and other waterfowl in Spitsbergen. *Polar Res.* **1**, 171-183.
- Rokitka, M. A. and Rahn, H. (1987). Regional differences in shell conductance and pore density of avian eggs. *Respir. Physiol.* **68**, 371-376.
- Samiullah, S. and Roberts, J. R. (2014). The eggshell cuticle of the laying hen. *World's Poultry Sci. J.* **70**, 693-708.
- Simkiss, K. (1986). Eggshell conductance—Fick's or Stefan's law? *Respir. Physiol.* **65**, 213-222.
- Sparks, N. H. C. and Board, R. G. (1984). Cuticle, shell porosity and water uptake through Hens' eggshells. *Br. Poultry Sci.* **25**, 267-276.
- Tazawa, H., Mikami, T. and Yoshimoto, C. (1971). Effect of reducing the shell area on the respiratory properties of chicken embryonic blood. *Respir. Physiol.* **13**, 352-360.
- Thompson, M. B. and Goldie, K. N. (1990). Conductance and structure of eggs of Adelie penguins, *Pygoscelis adeliae*, and its implications for incubation. *Condor* **92**, 304-312.
- Tøien, O., Paganelli, C. V., Rahn, H. and Johnson, R. R. (1988). Diffusive resistance of avian eggshell pores. *Respir. Physiol.* **74**, 345-354.
- Tschanz, B. (1990). Adaptations for breeding in Atlantic Alcids. *Neth. J. Zool.* **40**, 688-710.
- Tullett, S. G., Board, R. G., Love, G., Perrott, H. R. and Scott, V. D. (1976). Vaterite deposition during eggshell formation in the Cormorant, Gannet and Shag, and in 'Shell-less' eggs of the domestic fowl. *Acta Zool.* **57**, 79-87.
- Tyler, C. (1969). The snapping strength of the egg shells of various orders of birds. *J. Zool.* **159**, 65-77.
- Verbeek, N. A. M. (1984). The effects of adult fecal material on egg hatchability in Glaucous-winged Gulls (*Larus glaucescens*). *Auk* **101**, 824-829.
- Vorobyev, A. Y. and Guo, C. (2015). Multifunctional surfaces produced by femtosecond laser pulses. *J. Appl. Phys.* **117**, 033103.
- Wellman-Labadie, O., Picman, J. and Hincke, M. T. (2008). Antimicrobial activity of the Anseriform outer eggshell and cuticle. *Comp. Biochem. Physiol. B Biochem. Mol. Biol.* **149**, 640-649.
- Yuan, Y. and Lee, T. R. (2013). Contact angle and wetting properties. In *Surface Science Techniques* (ed. G. Bracco and B. Holst), pp. 3-34. Heidelberg, Berlin, Germany: Springer.
- Zimmermann, K. and Hipfner, J. M. (2007). Egg size, eggshell porosity, and incubation period in the marine bird family Alcidae. *Auk* **124**, 307-315.
